# Supplementary material
Source: PubMed Central journal article supplement (PMC3416040)
Supplement: NIHMS394703-supplement-Supplemental_Table.pdf [file NIHMS394703-supplement-Supplemental_Table.pdf]

Supplemental table 1. Primers

|                        | primer sequence         | probe                    |
|------------------------|-------------------------|--------------------------|
| Cloning promoter       | GGCTAGGATCGTTAATCGTGAAG | -                        |
|                        | CGCGCCCCGCTGGCAGG       |                          |
| Cloning enhancer       | TCTGACTTCATTTTCCAGGAT   | -                        |
|                        | CGGCTAACCACCCGATTTGTG   |                          |
| RT-qPCR: SLC22A5       | ACATGGGTGTGGGAGTCAG     | UPL #89                  |
|                        | CATGAGAATGTAGGGCAGGAA   |                          |
| RT-qPCR: cyclophilin   | ACGGCGAGCCCTTGG         | CGCGTCTCCTTTGAGCTGTTTGCA |
|                        | TTTCTGCTGTCTTTGGGACCT   |                          |
| ChIP: SLC22A5 promoter | CCTGGGCCAGTGACTTTCT     | UPL #33                  |
|                        | GAAGCTCCAGTGTGAAAACG    |                          |
| ChIP: SLC22A5 intron 1 | GATGGGTTCAGGGTGA CTTG   | UPL #85                  |
|                        | CGACAGCCTTGCC TCATAAT   |                          |
| ChIP: SLC22A5 enhancer | GGGAGAGGTTGACATCATGC    | UPL #34                  |
|                        | AATGCTGGTCTTCTTGGGACT   |                          |

UPL: universal probe library (Roche)
